# Supplementary material for: DISPLAR: an accurate method for predicting DNA-binding sites on protein surfaces
Source: PubMed Central journal article supplement — Nucleic Acids Res. 2007 Feb 6;35(5):1465–77. doi: 10.1093/nar/gkm008 (PMC1865077; doi:10.1093/nar/gkm008), 2007-02-06
Supplement: nar_gkm008_1.pdf [file nar_gkm008_1.pdf]

Tjong & Zhou  
Supplementary Table S1

| PDB  | Chains  | All Residues | Surface Residues | Interface Residues |
|------|---------|--------------|------------------|--------------------|
| 1A02 | N,F,J   | 385          | 292              | 48                 |
| 1A0A | A,B     | 126          | 107              | 30                 |
| 1A1I | A       | 85           | 82               | 34                 |
| 1A1V | A       | 429          | 283              | 32                 |
| 1A31 | A       | 457          | 327              | 55                 |
| 1A6B | B       | 40           | 38               | 14                 |
| 1A6Y | A,B     | 162          | 131              | 50                 |
| 1A73 | A,B     | 324          | 240              | 74                 |
| 1AIS | A,B     | 374          | 261              | 50                 |
| 1AM9 | A,B     | 155          | 135              | 33                 |
| 1AN4 | A,B     | 130          | 123              | 37                 |
| 1AWC | A,B     | 263          | 165              | 25                 |
| 1B01 | A,B     | 86           | 67               | 20                 |
| 1B3T | A,B     | 294          | 184              | 71                 |
| 1B69 | A       | 69           | 61               | 26                 |
| 1BDT | A,B     | 105          | 80               | 31                 |
| 1BG1 | A       | 558          | 366              | 11                 |
| 1BJ6 | A       | 42           | 40               | 16                 |
| 1BL0 | A       | 116          | 86               | 31                 |
| 1BRN | L       | 108          | 81               | 22                 |
| 1BVO | A       | 175          | 123              | 10                 |
| 1C7Y | A       | 199          | 147              | 22                 |
| 1C9B | A       | 207          | 142              | 35                 |
| 1CF7 | A,B     | 149          | 110              | 36                 |
| 1CKT | A       | 71           | 67               | 23                 |
| 1CL8 | A,B     | 522          | 320              | 68                 |
| 1CQT | A,I     | 156          | 132              | 52                 |
| 1CW0 | A       | 155          | 116              | 50                 |
| 1D02 | A,B     | 397          | 249              | 46                 |
| 1D5Y | A,B     | 576          | 405              | 35                 |
| 1D66 | A,B     | 114          | 98               | 31                 |
| 1DC1 | A,B     | 621          | 400              | 86                 |
| 1DCT | A       | 324          | 200              | 57                 |
| 1DEW | A       | 278          | 164              | 35                 |
| 1DFM | A,B     | 431          | 282              | 83                 |
| 1DH3 | A,C     | 110          | 104              | 27                 |
| 1DIZ | A       | 282          | 182              | 25                 |
| 1DMU | A       | 299          | 200              | 31                 |
| 1DP7 | P       | 76           | 65               | 14                 |
| 1ECR | A       | 305          | 234              | 67                 |
| 1EGW | A,B     | 143          | 110              | 39                 |
| 1EMH | A       | 223          | 141              | 17                 |
| 1EWN | A       | 200          | 129              | 23                 |
| 1EYG | A,B     | 216          | 167              | 92                 |
| 1F0V | A       | 124          | 101              | 12                 |
| 1F4K | A,B     | 230          | 157              | 50                 |
| 1F5E | P       | 65           | 54               | 22                 |
| 1FIU | A,B,C,D | 1144         | 605              | 127                |

|      |         |      |      |     |
|------|---------|------|------|-----|
| 1FJL | A,B     | 122  | 102  | 38  |
| 1FLO | A,B,C,D | 1618 | 1103 | 229 |
| 1FOK | A       | 568  | 345  | 64  |
| 1FW6 | A,B     | 1482 | 927  | 69  |
| 1FZP | D,B     | 205  | 180  | 14  |
| 1G38 | A       | 393  | 250  | 56  |
| 1G4D | A       | 69   | 56   | 23  |
| 1GAT | A       | 60   | 54   | 20  |
| 1GCC | A       | 63   | 53   | 21  |
| 1GD2 | E,F     | 129  | 119  | 32  |
| 1GDT | A,B     | 366  | 269  | 71  |
| 1GM5 | A       | 729  | 525  | 36  |
| 1GT0 | D       | 79   | 75   | 26  |
| 1GU4 | A,B     | 132  | 120  | 31  |
| 1GXP | A,B     | 204  | 152  | 51  |
| 1H6F | A,B     | 370  | 271  | 51  |
| 1H9D | A,B     | 250  | 164  | 17  |
| 1H9T | A,B     | 458  | 298  | 50  |
| 1HAO | L,H     | 280  | 162  | 11  |
| 1HCQ | A,B     | 145  | 107  | 38  |
| 1HCR | A       | 52   | 47   | 27  |
| 1HHT | P       | 664  | 391  | 40  |
| 1HLV | A       | 131  | 104  | 49  |
| 1HWT | C,D     | 144  | 116  | 37  |
| 1I3J | A       | 96   | 87   | 55  |
| 1I7D | A       | 620  | 415  | 48  |
| 1IAW | A,B     | 608  | 409  | 121 |
| 1IC8 | A,B     | 343  | 272  | 61  |
| 1IG4 | A       | 75   | 65   | 24  |
| 1IG9 | A       | 901  | 578  | 60  |
| 1IGN | A       | 189  | 157  | 58  |
| 1IMH | C,D     | 562  | 393  | 35  |
| 1J1V | A       | 92   | 70   | 26  |
| 1J3E | A       | 115  | 89   | 23  |
| 1J4W | A       | 145  | 118  | 35  |
| 1J5N | A       | 93   | 86   | 41  |
| 1J75 | A       | 57   | 46   | 8   |
| 1JB7 | A,B     | 676  | 420  | 61  |
| 1JE8 | A,B     | 126  | 96   | 48  |
| 1JEY | A,B     | 1023 | 638  | 55  |
| 1JFI | A,B     | 198  | 150  | 22  |
| 1JGG | A,B     | 114  | 99   | 31  |
| 1JJ4 | A,B     | 150  | 100  | 33  |
| 1JMC | A       | 238  | 171  | 36  |
| 1JT0 | A,B,C,D | 749  | 476  | 82  |
| 1JX4 | A       | 335  | 232  | 57  |
| 1K3X | A       | 253  | 164  | 26  |
| 1K78 | E,F     | 227  | 178  | 70  |
| 1K82 | A       | 260  | 171  | 35  |
| 1KDH | A       | 356  | 244  | 31  |
| 1KLN | A       | 595  | 378  | 44  |
| 1KQQ | A       | 131  | 98   | 23  |

|      |                 |     |     |     |
|------|-----------------|-----|-----|-----|
| 1KSY | A,C             | 290 | 191 | 30  |
| 1KX5 | A,B,C,D,E,F,G,H | 974 | 680 | 260 |
| 1L1M | A,B             | 124 | 110 | 58  |
| 1L3L | B,D             | 447 | 296 | 35  |
| 1LAU | E               | 228 | 147 | 17  |
| 1LB2 | E               | 66  | 51  | 13  |
| 1LE8 | A,B             | 127 | 109 | 34  |
| 1LEI | A,B             | 585 | 413 | 39  |
| 1LQ1 | A,B             | 210 | 151 | 36  |
| 1LWT | A               | 440 | 308 | 75  |
| 1M07 | A               | 110 | 84  | 17  |
| 1M3Q | A               | 314 | 199 | 31  |
| 1M5R | B               | 351 | 212 | 37  |
| 1M5X | A,B             | 322 | 224 | 80  |
| 1MDY | A,B             | 130 | 111 | 30  |
| 1MJE | B,A             | 642 | 438 | 30  |
| 1MJM | A,B             | 208 | 148 | 24  |
| 1MNN | A               | 290 | 203 | 35  |
| 1MOW | A               | 248 | 176 | 81  |
| 1MSE | C               | 105 | 88  | 44  |
| 1MSW | D               | 863 | 562 | 77  |
| 1MUS | A               | 458 | 300 | 43  |
| 1MW8 | X               | 561 | 384 | 36  |
| 1MWI | A               | 165 | 109 | 6   |
| 1NH2 | A,B,C,D         | 380 | 251 | 45  |
| 1NK3 | P               | 63  | 58  | 18  |
| 1NKP | A,B             | 171 | 141 | 33  |
| 1NVP | B,C,D           | 187 | 128 | 6   |
| 1ODH | A               | 157 | 121 | 31  |
| 1OE4 | A,B             | 490 | 287 | 25  |
| 1OMH | A               | 278 | 197 | 62  |
| 1ORN | A               | 214 | 149 | 33  |
| 1OUP | B               | 210 | 138 | 19  |
| 1OWF | A,B             | 190 | 141 | 65  |
| 1OZJ | A,B             | 250 | 174 | 31  |
| 1P71 | A,B             | 187 | 142 | 37  |
| 1P8K | Z               | 252 | 171 | 71  |
| 1PNR | A               | 338 | 217 | 15  |
| 1PP7 | U               | 114 | 86  | 27  |
| 1PUE | E               | 88  | 64  | 28  |
| 1PUF | A,B             | 150 | 127 | 50  |
| 1PYI | A,B             | 158 | 128 | 23  |
| 1QBJ | C               | 66  | 55  | 10  |
| 1QPI | A               | 195 | 157 | 7   |
| 1QRV | A,B             | 144 | 135 | 33  |
| 1QTM | A               | 539 | 339 | 63  |
| 1QUM | A               | 279 | 165 | 31  |
| 1QZG | A               | 170 | 122 | 23  |
| 1R0O | B               | 78  | 60  | 23  |
| 1R2Z | A               | 273 | 173 | 27  |
| 1R71 | A,B             | 230 | 182 | 55  |
| 1R7M | A               | 223 | 150 | 63  |

|      |         |      |     |     |
|------|---------|------|-----|-----|
| 1R8D | A,B     | 216  | 181 | 42  |
| 1R8E | A       | 275  | 216 | 11  |
| 1REP | C       | 214  | 138 | 37  |
| 1RFI | B       | 429  | 241 | 19  |
| 1RH6 | A       | 54   | 46  | 7   |
| 1RIO | A,B,H   | 248  | 193 | 61  |
| 1RPE | L,R     | 126  | 99  | 41  |
| 1RRC | A       | 276  | 190 | 19  |
| 1RRQ | A       | 343  | 234 | 51  |
| 1RXW | A       | 305  | 200 | 25  |
| 1RZR | G,C,T,L | 816  | 523 | 51  |
| 1S40 | A       | 187  | 133 | 39  |
| 1SA3 | B       | 262  | 179 | 40  |
| 1SAX | A,B     | 240  | 174 | 50  |
| 1SFU | A,B     | 140  | 115 | 19  |
| 1SKN | P       | 74   | 62  | 19  |
| 1SRS | A,B     | 164  | 121 | 45  |
| 1SX5 | A,B     | 482  | 312 | 82  |
| 1T05 | A,B     | 968  | 643 | 68  |
| 1T2K | A,B     | 218  | 176 | 61  |
| 1T2S | A       | 123  | 93  | 15  |
| 1TC3 | C       | 51   | 46  | 21  |
| 1TDZ | A       | 265  | 173 | 29  |
| 1TEZ | A       | 474  | 292 | 33  |
| 1TF6 | A,D     | 361  | 342 | 86  |
| 1TRO | A,C     | 203  | 155 | 42  |
| 1TSR | B       | 194  | 135 | 18  |
| 1TX3 | A,B     | 500  | 340 | 98  |
| 1U1Q | A       | 183  | 137 | 53  |
| 1U1Y | A,B,C   | 387  | 359 | 30  |
| 1U3E | M       | 174  | 141 | 69  |
| 1U4B | A       | 580  | 366 | 61  |
| 1U8B | A       | 128  | 102 | 31  |
| 1U8R | A,B,C,D | 884  | 565 | 88  |
| 1UAA | A,B     | 1269 | 795 | 72  |
| 1UBD | C       | 114  | 109 | 41  |
| 1UUT | A       | 195  | 135 | 13  |
| 1VAS | A       | 137  | 101 | 42  |
| 1VRR | A,B     | 406  | 251 | 72  |
| 1W0U | A,B     | 110  | 93  | 39  |
| 1WB9 | A,B     | 1542 | 942 | 65  |
| 1WTE | A,B     | 544  | 358 | 86  |
| 1X0F | A       | 79   | 60  | 20  |
| 1X9M | A,B     | 780  | 519 | 61  |
| 1X9N | A       | 626  | 403 | 86  |
| 1XI1 | A       | 571  | 381 | 18  |
| 1XJV | A       | 291  | 194 | 35  |
| 1XO0 | A,B     | 644  | 475 | 112 |
| 1XPX | A       | 144  | 107 | 13  |
| 1XSN | A       | 324  | 236 | 56  |
| 1XYI | A       | 66   | 56  | 21  |
| 1Y8Z | B       | 371  | 219 | 19  |

|      |             |      |     |     |
|------|-------------|------|-----|-----|
| 1YF3 | A           | 259  | 176 | 17  |
| 1YFH | C           | 149  | 107 | 19  |
| 1YNW | A,B         | 169  | 138 | 49  |
| 1YO5 | C           | 88   | 67  | 28  |
| 1YUI | A           | 54   | 53  | 25  |
| 1Z19 | A,B         | 539  | 397 | 133 |
| 1Z63 | A,B         | 916  | 608 | 37  |
| 1Z9C | A,B         | 274  | 182 | 54  |
| 1ZET | A           | 388  | 281 | 44  |
| 1ZJM | A           | 323  | 235 | 47  |
| 1ZLK | A,B         | 130  | 96  | 46  |
| 1ZME | C,D         | 140  | 120 | 34  |
| 1ZNS | A           | 118  | 87  | 27  |
| 1ZQ3 | P           | 68   | 62  | 26  |
| 1ZRF | A,B         | 403  | 292 | 46  |
| 1ZS4 | A,B,C,D     | 316  | 226 | 42  |
| 1ZTW | A           | 255  | 181 | 11  |
| 1ZX4 | A,B         | 344  | 264 | 25  |
| 1ZZI | A           | 82   | 67  | 21  |
| 2A07 | F,G,H,I,J,K | 487  | 378 | 87  |
| 2A0I | A           | 293  | 210 | 58  |
| 2A3V | A,B,C,D     | 1270 | 866 | 293 |
| 2A66 | A           | 95   | 79  | 30  |
| 2A6O | A,B         | 304  | 205 | 65  |
| 2AOR | A           | 220  | 159 | 41  |
| 2AQ4 | A           | 428  | 300 | 65  |
| 2AXY | A,B         | 137  | 101 | 40  |
| 2B9S | A,B         | 478  | 347 | 69  |
| 2BGW | A,B         | 419  | 253 | 32  |
| 2BNW | A,B,C,D     | 202  | 163 | 40  |
| 2BOP | A           | 85   | 69  | 10  |
| 2BPA | 1,3         | 462  | 328 | 11  |
| 2BZF | A           | 88   | 65  | 18  |
| 2C5R | A,B,C,D,E,F | 378  | 263 | 14  |
| 2C62 | A,B         | 132  | 105 | 43  |
| 2C6Y | A,B         | 193  | 153 | 46  |
| 2C7P | A           | 327  | 193 | 50  |
| 2C9L | Y,Z         | 125  | 105 | 28  |
| 2D7D | A,B         | 659  | 437 | 17  |
| 2DGC | A,B         | 98   | 92  | 32  |
| 2DNJ | A           | 253  | 151 | 22  |
| 2DRP | A           | 63   | 59  | 28  |
| 2ER8 | A,B         | 135  | 123 | 38  |
| 2EZV | A,B         | 536  | 341 | 70  |
| 2FDI | A           | 199  | 129 | 12  |
| 2FL3 | A           | 247  | 179 | 51  |
| 2FO1 | A,D,E       | 785  | 505 | 20  |
| 2G8I | A           | 134  | 89  | 22  |
| 2GLI | A           | 155  | 139 | 47  |
| 2HDD | A,B         | 111  | 99  | 31  |
| 2IRF | G,H         | 218  | 163 | 37  |
| 2LEF | A           | 86   | 77  | 39  |

|       |         |     |       |       |       |
|-------|---------|-----|-------|-------|-------|
| 2NLL  | B       |     | 103   | 86    | 30    |
| 2PJR  | A,B,F,G |     | 1276  | 761   | 67    |
| 3BAM  | A,B     |     | 415   | 260   | 76    |
| 3CRO  | L,R     |     | 130   | 100   | 44    |
| 3HTS  | B       |     | 82    | 66    | 12    |
| 3PVI  | A,B     |     | 312   | 215   | 65    |
| 4DPV  | Z       |     | 559   | 438   | 26    |
| 6CRO  | A       |     | 60    | 52    | 19    |
| Total |         | 428 | 80983 | 56093 | 11305 |
